# Supplementary material for: Structure, Luminescence and Temperature Detection Capability of [C(NH2)3]M(HCOO)3 (M = Mg2+, Mn2+, Zn2+) Hybrid Organic–Inorganic Formate Perovskites Containing Cr3+ Ions
Source: MDPI journal article supplement (doi:10.3390/s23146259), 2023-07-09
Supplement: s1 [file s1]

## Structure, luminescence and temperature detection capability of $[\text{C}(\text{NH}_2)_3]\text{M}(\text{HCOO})_3$ ( $\text{M} = \text{Mg}^{2+}, \text{Mn}^{2+}, \text{Zn}^{2+}$ ) hybrid organic-inorganic formate perovskites containing $\text{Cr}^{3+}$ ions

Dagmara Stefańska <sup>1\*</sup>, Adam Kabański <sup>1</sup>, Thi Hong Quan Vu <sup>1</sup>, Marek Adaszyński <sup>1</sup>, and Maciej Ptak <sup>1</sup>

<sup>1</sup> W. Trzebiatowski Institute of Low Temperature and Structure Research of the Polish Academy of Sciences, Wrocław, Poland;

\*Correspondence: d.stefanska@intibs.pl

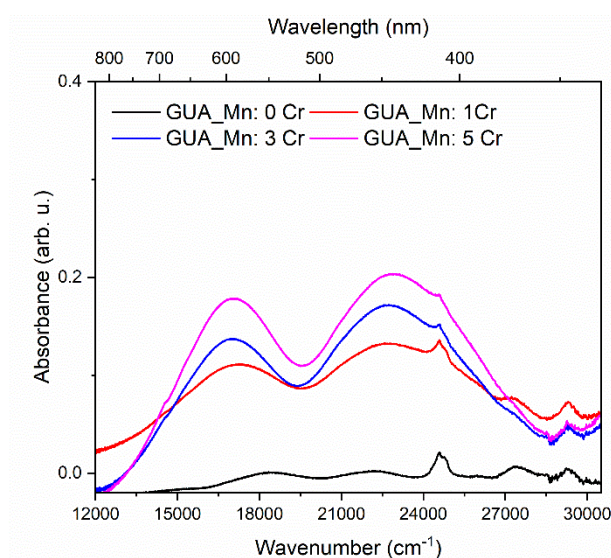

Figure S1. Diffuse reflectance spectra of a series of  $[\text{GA}]\text{Mn}_{1-x}\text{Cr}_x(\text{HCOO})_3$  ( $x = 0, 0.01, 0.03, 0.05$ ) measured at 300 K.

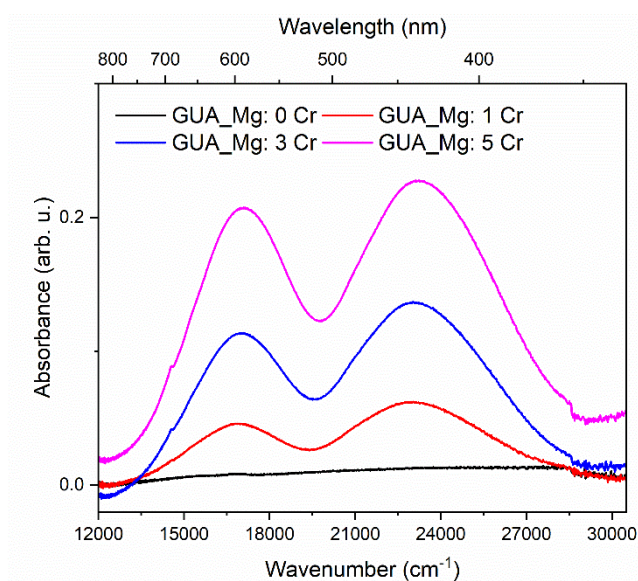

Figure S2. Diffuse reflectance spectra of a series of  $[\text{GA}]\text{Mg}_{1-x}\text{Cr}_x(\text{HCOO})_3$  ( $x = 0, 0.01, 0.03, 0.05$ ) measured at 300 K.

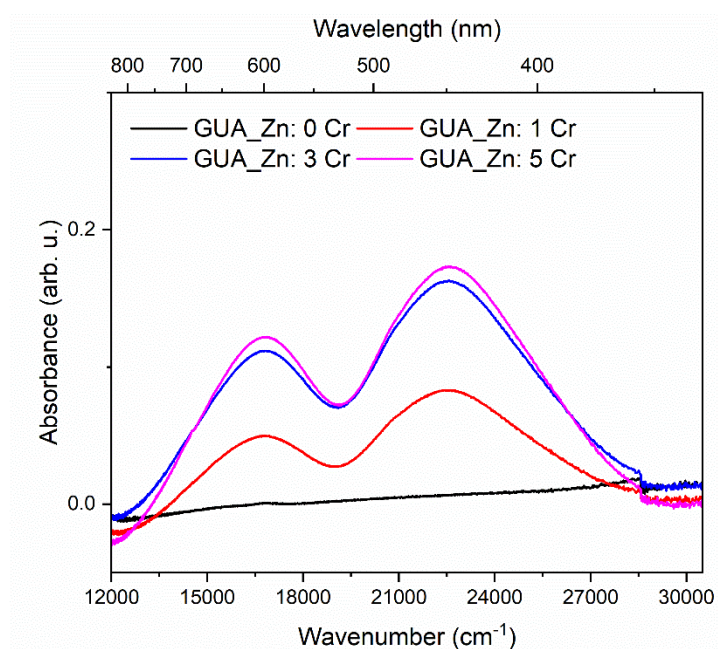

Figure S3. Diffuse reflectance spectra of a series of  $[\text{GA}]\text{Zn}_{1-x}\text{Cr}_x(\text{HCOO})_3$  ( $x = 0, 0.01, 0.03, 0.05$ ) measured at 300 K.

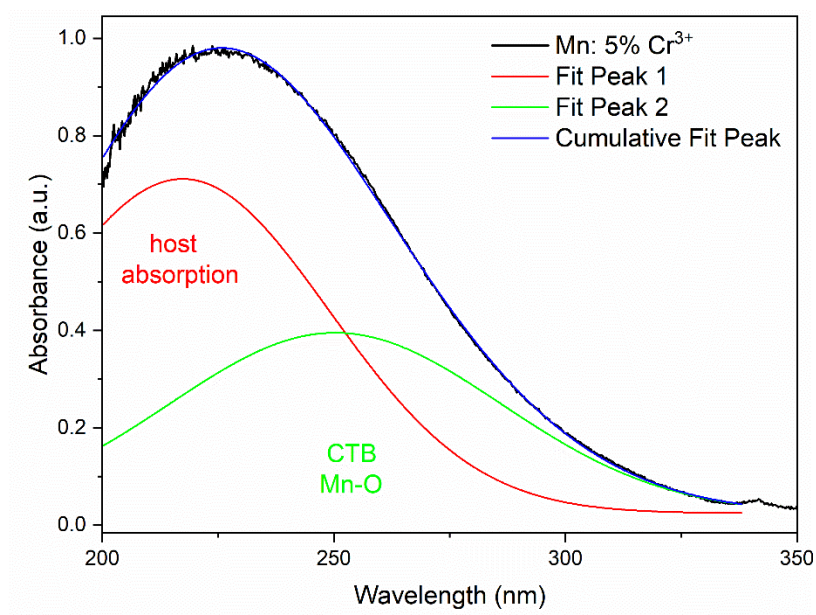

Figure S4. Deconvolution of absorption spectrum of  $[\text{GA}]\text{Mn}_{1-x}\text{Cr}_x(\text{HCOO})_3$  ( $x = 0.05$ ) measured at 300 K.

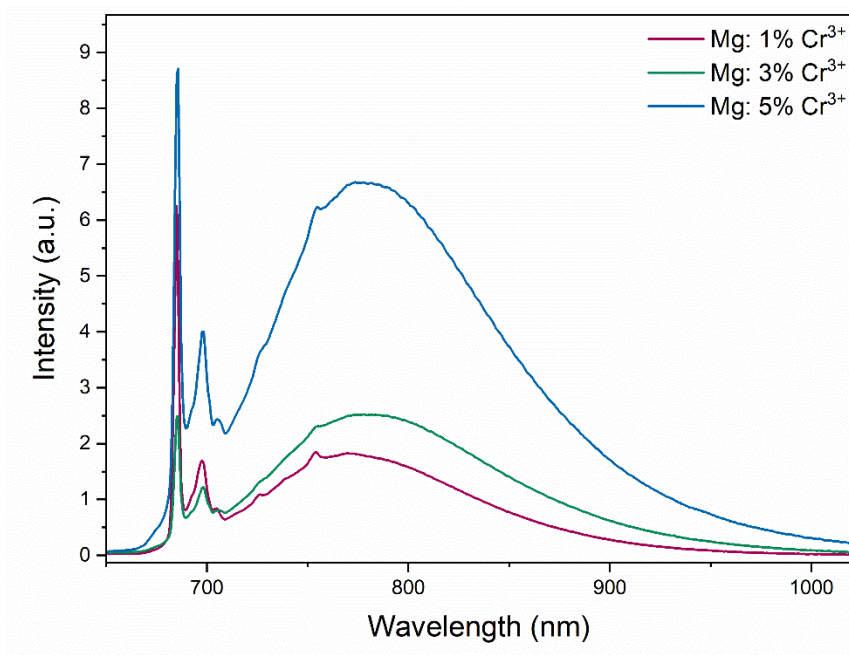

Figure S5. Low-temperature emission spectra of  $[\text{GA}]\text{Mg}_{1-x}\text{Cr}_x(\text{HCOO})_3$  ( $x = 0.01, 0.03, 0.05$ ).

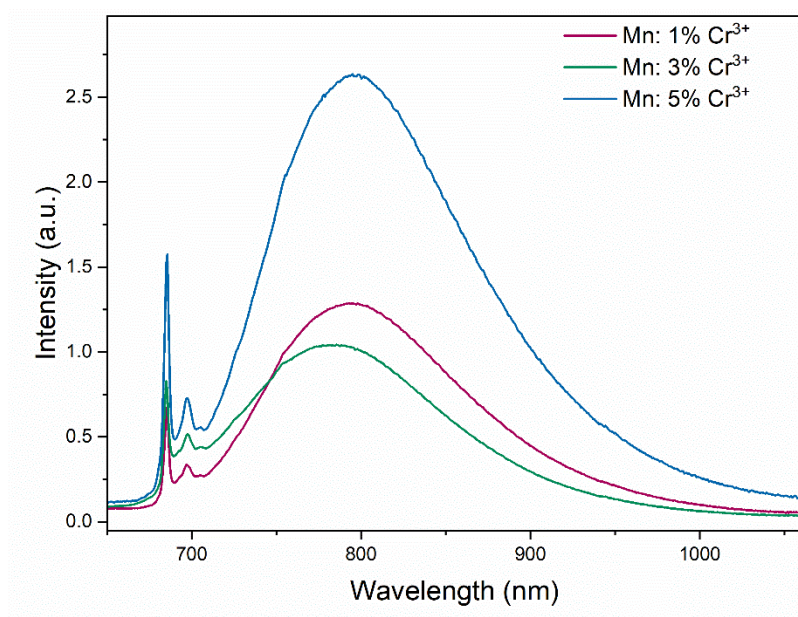

Figure S6. Low-temperature emission spectra of  $[\text{GA}]\text{Mn}_{1-x}\text{Cr}_x(\text{HCOO})_3$  ( $x = 0.01, 0.03, 0.05$ ).

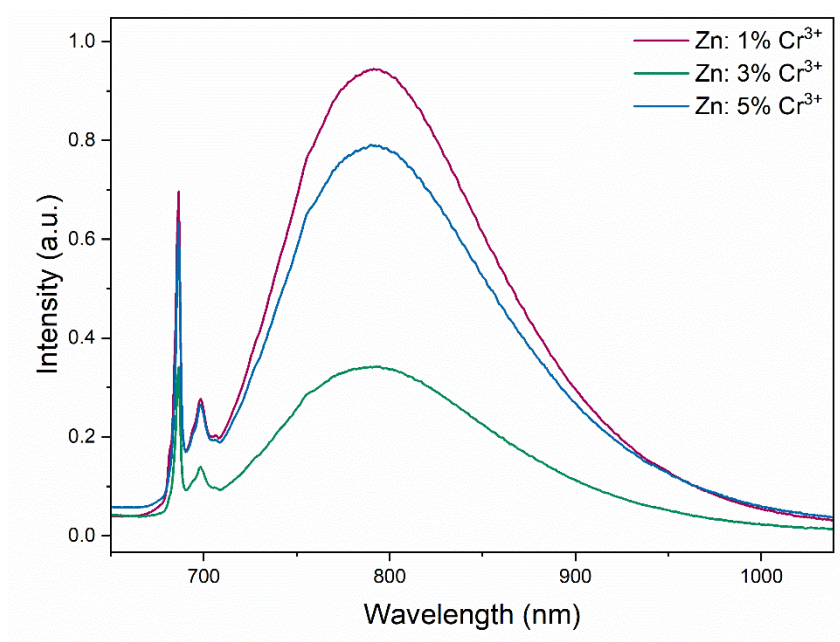

Figure S7. Low-temperature emission spectra of [GA]Zn<sub>1-x</sub>Cr<sub>x</sub>(HCOO)<sub>3</sub> ( $x = 0.01, 0.03, 0.05$ ).



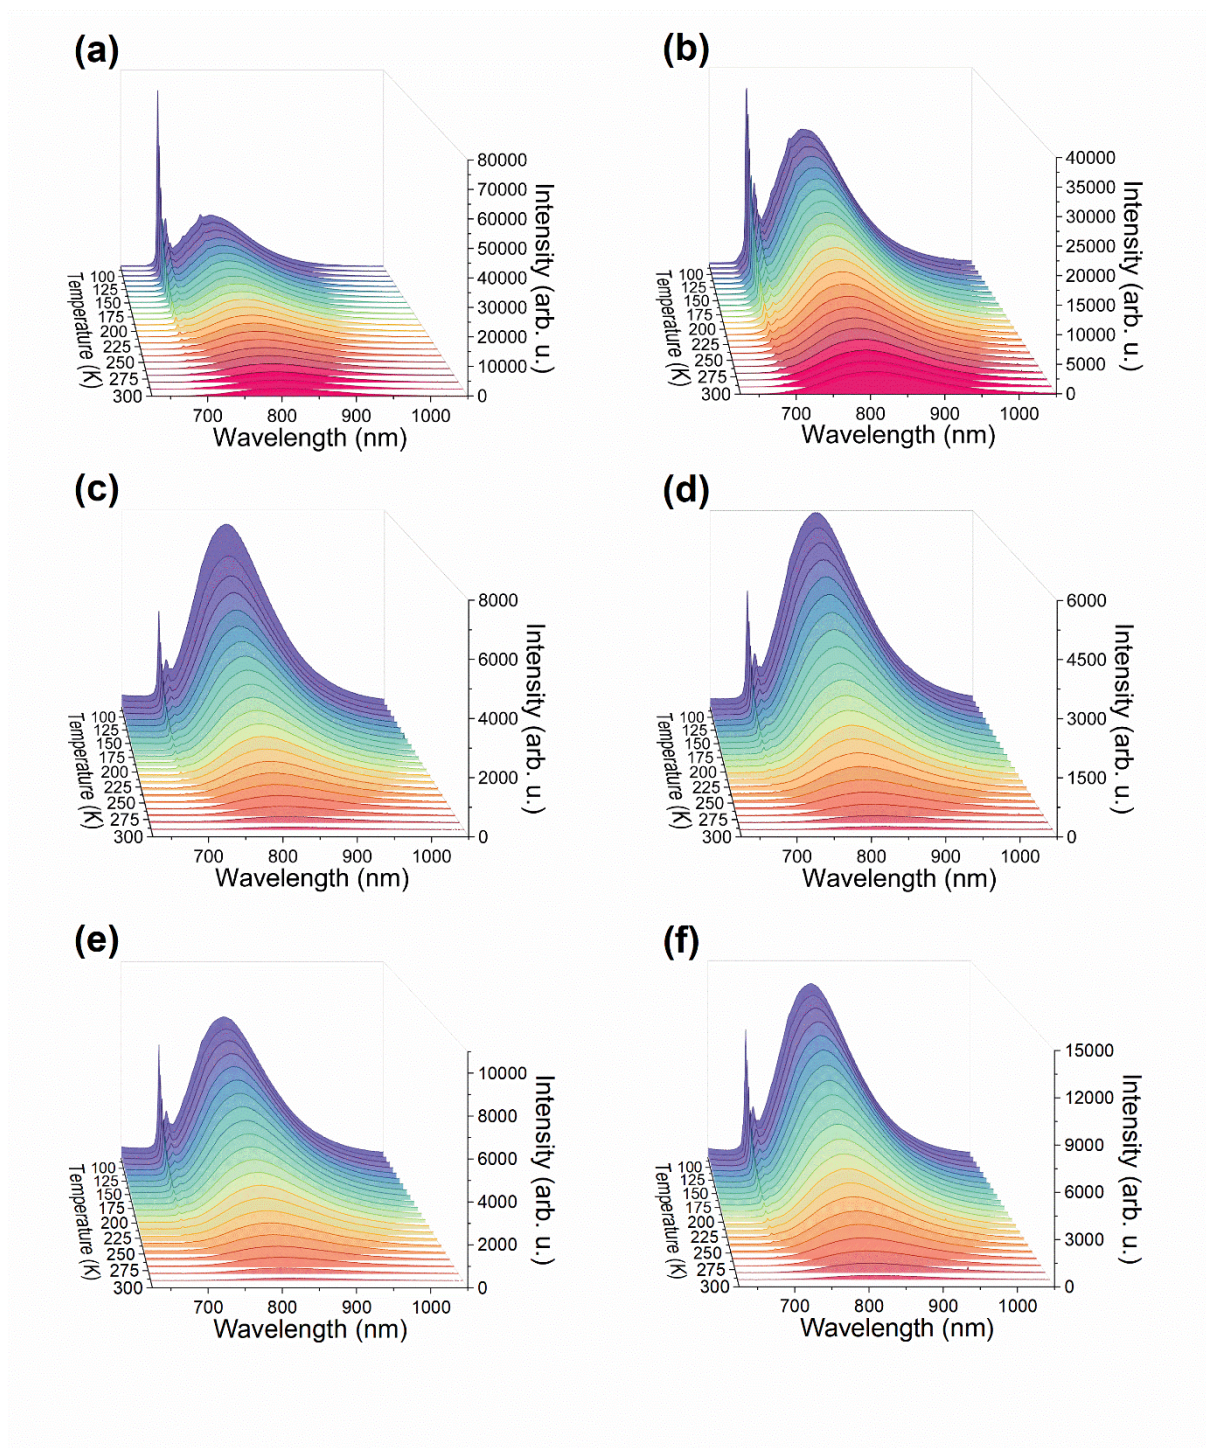

Figure S8. Temperature-dependent emission spectra of  $[\text{GA}]\text{Mn}_{1-x}\text{Cr}_x(\text{HCOO})_3$   $x = 0.01$  (a),  $[\text{GA}]\text{Mn}_{1-x}\text{Cr}_x(\text{HCOO})_3$   $x = 0.03$  (b),  $[\text{GA}]\text{Mg}_{1-x}\text{Cr}_x(\text{HCOO})_3$   $x = 0.01$  (c),  $[\text{GA}]\text{Mg}_{1-x}\text{Cr}_x(\text{HCOO})_3$   $x = 0.03$  (d),  $[\text{GA}]\text{Zn}_{1-x}\text{Cr}_x(\text{HCOO})_3$   $x = 0.01$  (e), and  $[\text{GA}]\text{Zn}_{1-x}\text{Cr}_x(\text{HCOO})_3$   $x = 0.03$  (f) samples.

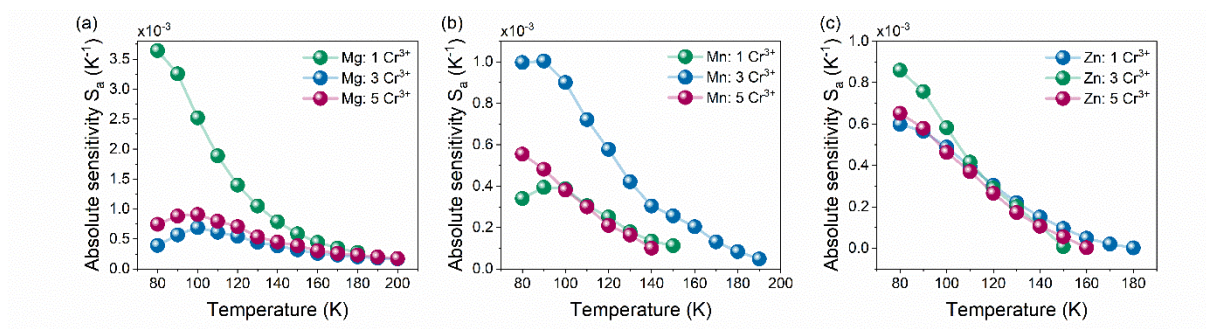

Figure S9 Influence of  $Cr^{3+}$  ions concentration on absolute sensitivity ( $S_a$ ) (a-c) of  $[GA]M_{1-x}Cr_x(HCOO)_3$  ( $M = Mg^{2+}, Mn^{2+}, Zn^{2+}$ , and  $x = 0.01, 0.03, 0.05$ ) hybrid perovskites.

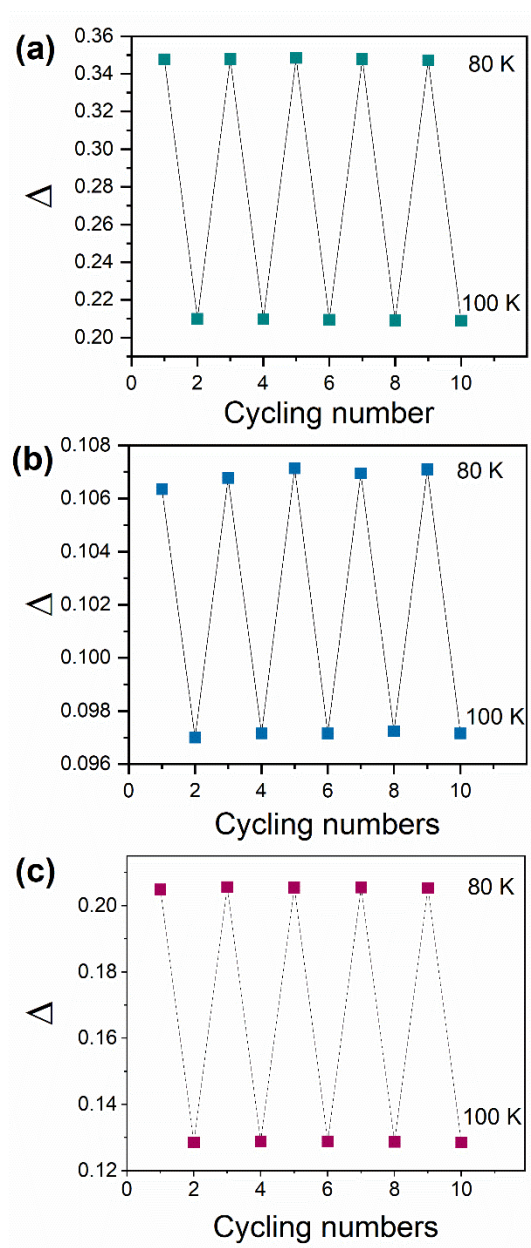

Fig. S10 Repeatability of  $\Delta$  temperature parameter of  $I_1/I_2$  emission evaluated at 80 K and 100 K during 10 heating/cooling cycles of (a)  $[GA]Mg_{1-x}Cr_x(HCOO)_3$   $x = 0.01$ , (b)  $[GA]Mn_{1-x}Cr_x(HCOO)_3$   $x = 0.03$ , and (c)  $[GA]Zn_{1-x}Cr_x(HCOO)_3$   $x = 0.01$ .

Table S1. Quantities of precursors used for the syntheses of the series of [GA]Mn<sub>1-x</sub>Cr<sub>x</sub>(HCOO)<sub>3</sub>.

| x    | HCOOH, m (g) | GA, m (g) | Mn(ClO <sub>4</sub> ) <sub>2</sub> ·6H <sub>2</sub> O, m (g) | CrCl <sub>3</sub> ·6H <sub>2</sub> O, m (g) |
|------|--------------|-----------|--------------------------------------------------------------|---------------------------------------------|
| 0    | 0.4          | 0.7600    | 0.3618                                                       | 0                                           |
| 0.01 | 0.4          | 0.7600    | 0.3582                                                       | 0.0027                                      |
| 0.03 | 0.4          | 0.7600    | 0.3510                                                       | 0.0080                                      |
| 0.05 | 0.4          | 0.7600    | 0.3437                                                       | 0.0133                                      |

Table S2. Quantities of precursors used for the syntheses of the series of [GA]Mg<sub>1-x</sub>Cr<sub>x</sub>(HCOO)<sub>3</sub>.

| x    | HCOOH, m (g) | GA, m (g) | MgCl <sub>2</sub> , m (g) | CrCl <sub>3</sub> ·6H <sub>2</sub> O, m (g) |
|------|--------------|-----------|---------------------------|---------------------------------------------|
| 0    | 0.4          | 0.7600    | 0.0952                    | 0                                           |
| 0.01 | 0.4          | 0.7600    | 0.0943                    | 0.0027                                      |
| 0.03 | 0.4          | 0.7600    | 0.0924                    | 0.0080                                      |
| 0.05 | 0.4          | 0.7600    | 0.0904                    | 0.0133                                      |

Table S3. Quantities of precursors used for the syntheses of the series of [GA]Zn<sub>1-x</sub>Cr<sub>x</sub>(HCOO)<sub>3</sub>.

| x    | HCOOH, m (g) | GA, m (g) | ZnCl <sub>2</sub> , m (g) | CrCl <sub>3</sub> ·6H <sub>2</sub> O, m (g) |
|------|--------------|-----------|---------------------------|---------------------------------------------|
| 0    | 0.4          | 0.7600    | 0.13630                   | 0                                           |
| 0.01 | 0.4          | 0.7600    | 0.13494                   | 0.0027                                      |
| 0.03 | 0.4          | 0.7600    | 0.13221                   | 0.0080                                      |
| 0.05 | 0.4          | 0.7600    | 0.12949                   | 0.0133                                      |

Table S4. Lattice parameters and calculated factors (*d*<sub>oct</sub>, average M<sup>II</sup>–O bond length; *V*<sub>oct</sub>, M<sup>II</sup>O<sub>6</sub> octahedral volume; σ<sup>2</sup>, bond angle variance; Δ, distortion index) [10.1107/S0021889811038970] for [GA]Mn(HCOO)<sub>3</sub> and [GA]Zn(HCOO)<sub>3</sub> based on the crystal data published in [10.1002/chem.200901605].

|                                           | [GA]Mn(HCOO) <sub>3</sub> | [GA]Zn(HCOO) <sub>3</sub> |
|-------------------------------------------|---------------------------|---------------------------|
| <i>a</i> (Å)                              | 8.5211                    | 8.3493                    |
| <i>b</i> (Å)                              | 11.9779                   | 11.7276                   |
| <i>c</i> (Å)                              | 9.0593                    | 8.9089                    |
| <i>V</i> (Å <sup>3</sup> )                | 924.63                    | 872.34                    |
| <i>d</i> <sub>oct</sub> (Å)               | 2.1611–2.1902             | 2.0855–2.1267             |
| <i>V</i> <sub>oct</sub> (Å <sup>3</sup> ) | 13.59                     | 12.22                     |
| σ <sup>2</sup> (deg <sup>2</sup> )        | 33.47                     | 30.41                     |
| Δ (×10 <sup>3</sup> )                     | 5.33                      | 7.91                      |

The calculation of the temperature resolution  $dT$  has been performed according to the methodology presented by Brites et al. [1]:

$$\delta T = \frac{1}{S_r} \frac{\delta \text{FIR}}{\text{FIR}},$$

where  $S_r$  is relative sensitivity, and  $\delta \text{FIR}$  is the uncertainty of determination of the FIR. The value of the  $\delta \text{FIR}$  is a standard deviation of the difference between calculated FIR values and the fitted with the equation describing the thermal quenching of the luminescence [2, 3]:

$$y = \frac{y_0}{1 + A \cdot e^{-\frac{E_a}{k \cdot T}}}$$

where  $A$  is a constant value,  $E_a$  is the activation energy of thermal quenching, and  $k$  is Boltzmann's constant.

[1] C.D.S. Brites, A. Millan, L.D. Carlos, Lanthanides in Luminescent Thermometry, Handbook on the Physics and Chemistry of Rare Earths, 2016, 49, 339-427, <https://doi.org/10.1016/bs.hpcr.2016.03.005>

[2] M.A. Reshchikov, *Physica Status Solidi a*, 2020, 218, 1, 2000101. <https://doi.org/10.1002/pssa.202000101>

[3] S. Shionoya, *Photoluminescence in Luminescence of Solids*. Springer, Boston, MA. [https://doi.org/10.1007/978-1-4615-5361-8\\_3](https://doi.org/10.1007/978-1-4615-5361-8_3)
